# Supplementary material for: Leptin, Ghrelin, and Leptin/Ghrelin Ratio in Critically Ill Patients
Source: MDPI journal article supplement (doi:10.3390/nu12010036), 2019-12-21
Supplement: s1 [file s1]

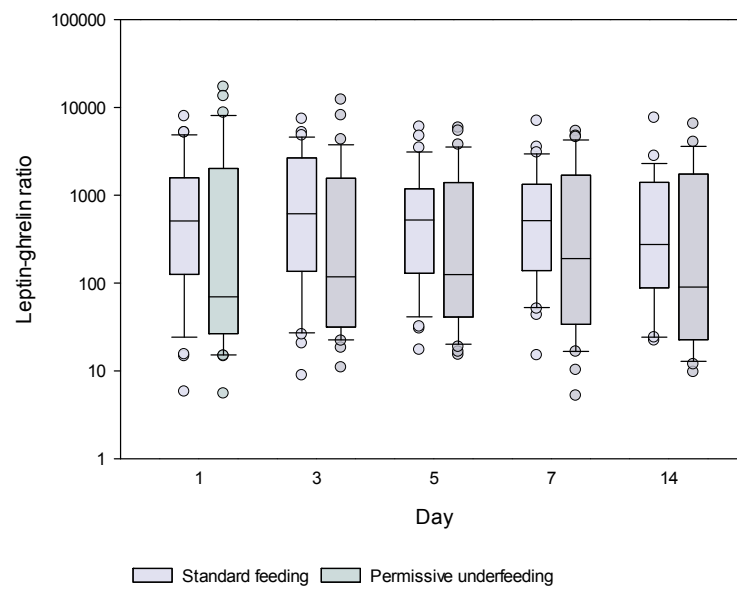

**Figure 1.** Serial leptin-ghrelin ratio in the permissive underfeeding and standard feeding groups. Data are presented using the box plot with medians and quartiles 1 and 3. The error bars refer to 10<sup>th</sup> and 90<sup>th</sup> percentiles.

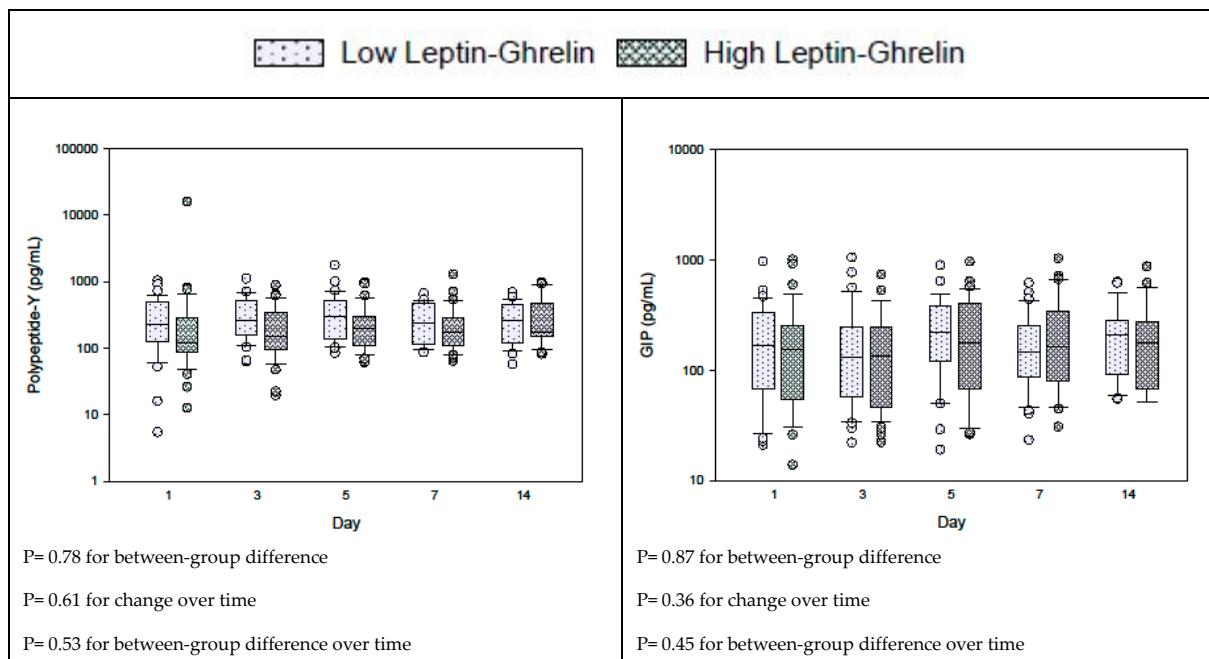

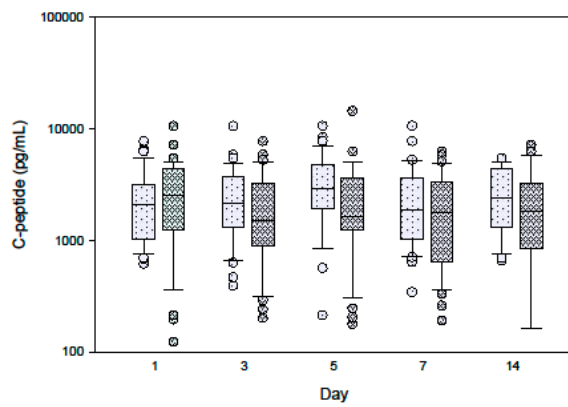

P= 0.39 for between-group difference

P= 0.12 for change over time

P= 0.20 for between-group difference over time

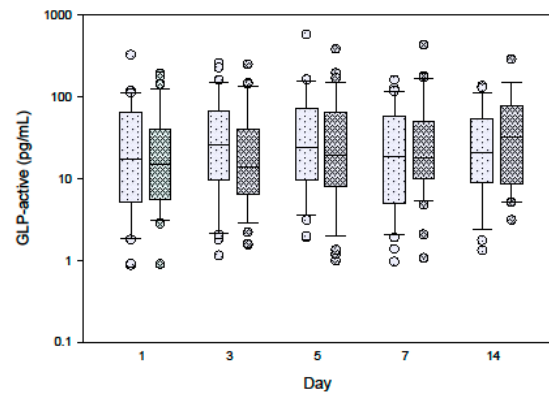

P= 0.99 for between-group difference

P= 0.16 for change over time

P= 0.12 for between-group difference over time

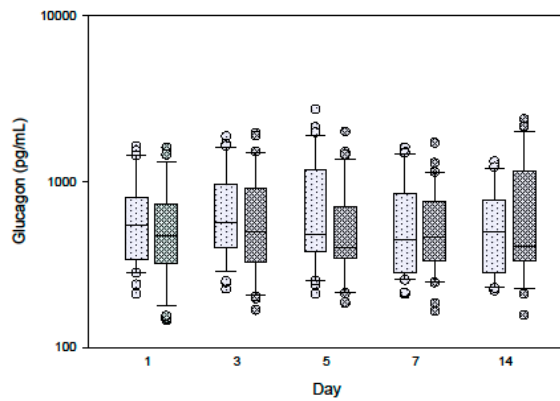

P= 0.57 for between-group difference

P= 0.004 for change over time

P= 0.007 for between-group difference over time

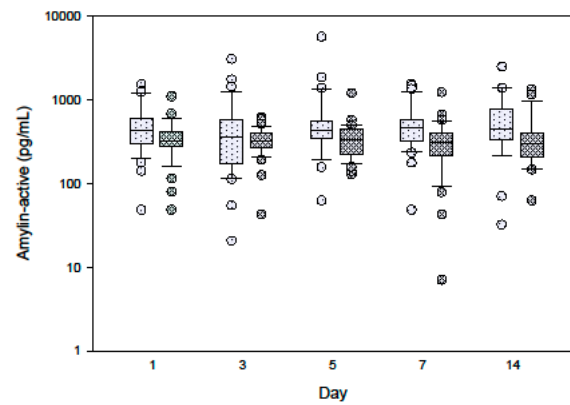

P= 0.008 for between-group difference

P= 0.50 for change over time

P= 0.58 for between-group difference over time

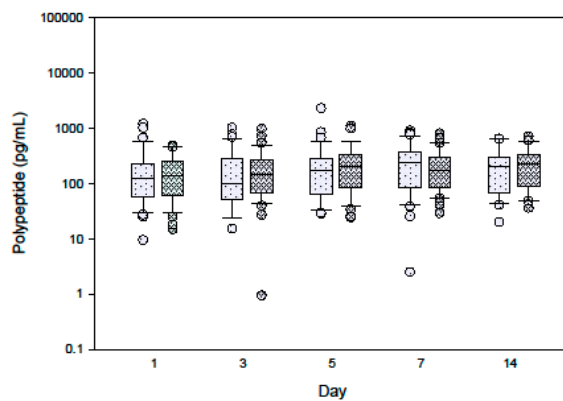

P= 0.91 for between-group difference

P= 0.06 for change over time

P= 0.77 for between-group difference over time

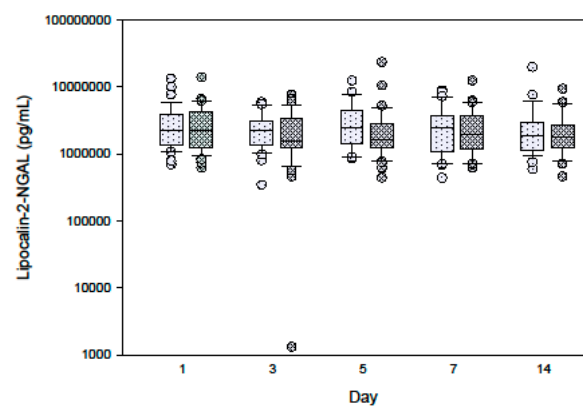

P= 0.57 for between-group difference

P= 0.30 for change over time

P= 0.97 for between-group difference over time

Figure 2 displays three box plots showing the plasma concentrations of IL-1B, IL-6, and TNF-α (pg/mL) over 14 days for two groups: Low Leptin-Ghrelin (dotted box) and High Leptin-Ghrelin (checkered box). The y-axis for all plots is on a logarithmic scale.

**IL-1B (pg/mL):** The y-axis ranges from 0.01 to 1000. The x-axis shows days 1, 3, 5, 7, and 14. Individual data points are overlaid on the box plots. P-values:  $P=0.15$  for between-group difference,  $P=0.79$  for change over time,  $P=0.84$  for between-group difference over time.

**IL-6 (pg/mL):** The y-axis ranges from 0.1 to 10000. The x-axis shows days 1, 3, 5, 7, and 14. Individual data points are overlaid on the box plots. P-values:  $P=0.11$  for between-group difference,  $P=0.08$  for change over time,  $P=0.38$  for between-group difference over time.

**TNF-α (pg/mL):** The y-axis ranges from 1 to 1000. The x-axis shows days 1, 3, 5, 7, and 14. Individual data points are overlaid on the box plots. P-values:  $P=0.74$  for between-group difference,  $P=0.03$  for change over time,  $P=0.37$  for between-group difference over time.

**Figure 2: Cytokine Levels (pg/mL) over 14 Days**

**Legend:** Low Leptin-Ghrelin (Dotted box), High Leptin-Ghrelin (Cross-hatched box)

**IL-1B (pg/mL)**

| Day | Low Leptin-Ghrelin (Median) | High Leptin-Ghrelin (Median) |
|-----|-----------------------------|------------------------------|
| 1   | ~1.0                        | ~1.0                         |
| 3   | ~1.0                        | ~1.0                         |
| 5   | ~1.0                        | ~1.0                         |
| 7   | ~1.0                        | ~1.0                         |
| 14  | ~1.0                        | ~1.0                         |

P=0.15 for between-group difference  
P=0.79 for change over time  
P=0.84 for between-group difference over time

**IL-6 (pg/mL)**

| Day | Low Leptin-Ghrelin (Median) | High Leptin-Ghrelin (Median) |
|-----|-----------------------------|------------------------------|
| 1   | ~100                        | ~50                          |
| 3   | ~100                        | ~50                          |
| 5   | ~100                        | ~50                          |
| 7   | ~100                        | ~50                          |
| 14  | ~100                        | ~50                          |

P=0.11 for between-group difference  
P=0.08 for change over time  
P=0.38 for between-group difference over time

**TNF-α (pg/mL)**

| Day | Low Leptin-Ghrelin (Median) | High Leptin-Ghrelin (Median) |
|-----|-----------------------------|------------------------------|
| 1   | ~20                         | ~20                          |
| 3   | ~20                         | ~20                          |
| 5   | ~20                         | ~20                          |
| 7   | ~20                         | ~20                          |
| 14  | ~20                         | ~20                          |

P=0.74 for between-group difference  
P=0.03 for change over time  
P=0.37 for between-group difference over time
